# Supplementary material
Source: HighWire-hosted journal article supplement (https://jnis.bmj.com/content/jnis-2023-021126)

## **Supplement Tables**

### **Table S1: site of enrollment**

| <b><u>Site Name</u></b>                                         | <b><u>Role</u></b>                  | <b><u>First Name</u></b> | <b><u>Last Name</u></b> | <b><u>Patients Enrolled</u></b>                                                  |
|-----------------------------------------------------------------|-------------------------------------|--------------------------|-------------------------|----------------------------------------------------------------------------------|
| Hospital Son Espases,<br>Mallorca, ES                           | Principal Investigator              | Salvador                 | Miralbes                | N Total = 154<br>*SR Classic = 39/154 (25%)<br>SR Combo = 11<br>Direct Asp = 104 |
|                                                                 | Sub-Investigator                    | Marc                     | Viles                   |                                                                                  |
|                                                                 | Sub-Investigator                    | Rebeca                   | Bermejo                 |                                                                                  |
|                                                                 | Sub-Investigator                    | Ángel                    | Calleja                 |                                                                                  |
| McLaren Health Care,<br>Michigan, USA                           | Principal Investigator              | Bharath                  | Naravetla               | N Total = 151<br>SR Classic = 27<br>*SR Combo = 67/151 (44%)<br>Direct Asp = 57  |
|                                                                 | Sub-Investigator                    | Aniel                    | Majjhoo                 |                                                                                  |
|                                                                 | Sub-Investigator                    | Mahmoud                  | Rayes                   |                                                                                  |
|                                                                 | Study Coordinator                   | Onishchuk                | Valentyna               |                                                                                  |
|                                                                 | Study Coordinator                   | Tanya Mosley             | Gardner                 |                                                                                  |
|                                                                 | Study Coordinator                   | Emily                    | Paschal                 |                                                                                  |
|                                                                 | Study Coordinator                   | Stephanie                | Bruma                   |                                                                                  |
| Medical University of<br>South Carolina,<br>Charleston, SC, USA | Principal Investigator              | Alejandro                | Spiotta                 | N Total = 100<br>SR Classic = 0<br>SR Combo = 9<br>*Direct Asp = 91/100 (91%)    |
|                                                                 | Sub-Investigator                    | Jonathan                 | Lena                    |                                                                                  |
|                                                                 | Sub-Investigator                    | Kimberly                 | Kicielinski             |                                                                                  |
|                                                                 | Sub-Investigator                    | Sami                     | Al Kasab                |                                                                                  |
|                                                                 | Study Coordinator                   | Emily                    | Infinger                |                                                                                  |
|                                                                 | Study Coordinator                   | Melza                    | Van Roijen              |                                                                                  |
|                                                                 | Study Coordinator                   | Meredith                 | Robinson                |                                                                                  |
| Klinikum Vest<br>Recklinghausen,<br>Recklinghausen, DE          | Principal Investigator              | Christian                | Loehr                   | N Total = 69<br>SR Classic = 0<br>SR Combo = 25<br>*Direct Asp = 44/69 (64%)     |
|                                                                 | Sub-Investigator                    | Stephan                  | Bossmann                |                                                                                  |
|                                                                 | Sub-Investigator                    | Jan Oliver               | Kuhnt                   |                                                                                  |
|                                                                 | Sub-Investigator                    | Axel                     | Schaefer                |                                                                                  |
|                                                                 | Sub-Investigator                    | Andreea                  | Cioltan                 |                                                                                  |
|                                                                 | Sub-Investigator                    | Johanna                  | Zabel                   |                                                                                  |
|                                                                 | Sub-Investigator                    | Christian                | Dynak                   |                                                                                  |
| Uniklinik Heidelberg,<br>Heidelberg, DE                         | ASSIST Registry<br>Global Principal | Markus                   | Möhlenbruch             | N Total = 69<br>SR Classic = 0                                                   |

|                                                                         |                                                                          |               |                   |                                                                              |
|-------------------------------------------------------------------------|--------------------------------------------------------------------------|---------------|-------------------|------------------------------------------------------------------------------|
|                                                                         | Investigator, Steering Committee Member                                  |               |                   | *SR Combo = 64/69 (93%)<br>Direct Asp = 5                                    |
|                                                                         | Sub-Investigator                                                         | Christian     | Herweh            |                                                                              |
|                                                                         | Sub-Investigator                                                         | Christian     | Ulfert            |                                                                              |
|                                                                         | Sub-Investigator                                                         | Johannes      | Pfaff             |                                                                              |
|                                                                         | Sub-Investigator                                                         | Alexander     | Hubert            |                                                                              |
|                                                                         | Sub-Investigator                                                         | Alexander     | Mohr              |                                                                              |
|                                                                         | Sub-Investigator                                                         | Leonie        | Jestaedt          |                                                                              |
|                                                                         | Sub-Investigator                                                         | Jessica       | Jesser            |                                                                              |
|                                                                         | Sub-Investigator                                                         | Dominik       | Vollherbst        |                                                                              |
|                                                                         | Sub-Investigator                                                         | Faith         | Seker             |                                                                              |
|                                                                         | Sub-Investigator                                                         | Tim           | Hilgenfeld        |                                                                              |
|                                                                         | Study Coordinator                                                        | Susanne       | Bonekamp          |                                                                              |
|                                                                         | Study Coordinator                                                        | Sabine        | Johnson           |                                                                              |
|                                                                         | Study Coordinator                                                        | Jenny         | Frech             |                                                                              |
|                                                                         | CT Upload                                                                | Lukas         | Diebold           |                                                                              |
| CT Upload                                                               | Gabriele                                                                 | Neureither    |                   |                                                                              |
| Hospital Clínico Universitario de Valladolid, Valladolid, ES            | Principal Investigator                                                   | Mario         | Martínez-Galdámez | N Total = 67<br>*SR Classic = 45/67 (67%)<br>SR Combo = 7<br>Direct Asp = 15 |
|                                                                         | Principal Investigator                                                   | Miguel Arturo | Schüller          |                                                                              |
|                                                                         | Sub-Investigator                                                         | Jorge         | Galván            |                                                                              |
|                                                                         | Sub-Investigator                                                         | Mercedes      | De Lera           |                                                                              |
|                                                                         | Sub-Investigator                                                         | Carlos        | Castañeda         |                                                                              |
|                                                                         | Sub-Investigator                                                         | Javier        | Rodríguez         |                                                                              |
| Department of Neurology, WellStar Health System, Marietta, Georgia, USA | ASSIST Registry Global Principal Investigator, Steering Committee Member | Rishi         | Gupta             | N Total = 53<br>SR Classic = 0<br>*SR Combo = 51/53 (96%)<br>Direct Asp = 2  |
|                                                                         | Sub-Investigator                                                         | Ahmad         | Khalidi           |                                                                              |
|                                                                         | Sub-Investigator                                                         | William       | Humphries         |                                                                              |
|                                                                         | Study Coordinator                                                        | Stephanie     | Rowe              |                                                                              |
|                                                                         | Study Coordinator                                                        | Lauryn        | Taylor            |                                                                              |

|                                                                    |                                                   |              |                  |                                                                              |
|--------------------------------------------------------------------|---------------------------------------------------|--------------|------------------|------------------------------------------------------------------------------|
|                                                                    | Study Coordinator                                 | Martha       | Kelly            |                                                                              |
| Rhode Island Hospital,<br>Providence, Rhode<br>Island, USA         | Principal Investigator                            | Ryan         | McTaggart        | N Total = 49<br>SR Classic = 1<br>SR Combo = 45<br>*Direct Asp = 3/49 (6%)   |
|                                                                    | Sub-Investigator                                  | Mahesh       | Jayaraman        |                                                                              |
|                                                                    | Sub-Investigator                                  | Richard      | Haas             |                                                                              |
|                                                                    | Sub-Investigator                                  | Radmehr      | Torabi           |                                                                              |
|                                                                    | Study Coordinator                                 | Wendy        | Smith            |                                                                              |
|                                                                    | Study Coordinator                                 | Gina         | Merola           |                                                                              |
|                                                                    | Study Coordinator                                 | Susan        | Foley            |                                                                              |
| Ghent University<br>Hospital, Ghent, BE                            | Principal Investigator                            | Luc          | Defreyne         | N Total = 45<br>SR Classic = 1<br>*SR Combo = 42/45 (93%)<br>Direct Asp = 2  |
|                                                                    | Sub-Investigator                                  | Elisabeth    | Dhondt           |                                                                              |
|                                                                    | Sub-Investigator                                  | Peter        | Vanlangenhove    |                                                                              |
|                                                                    | Sub-Investigator                                  | Laurens      | Hermie           |                                                                              |
|                                                                    | Study Coordinator                                 | Lynn         | Huyck            |                                                                              |
|                                                                    | Study Coordinator                                 | Lien         | Van Cauwenberghe |                                                                              |
| Hospital Universitario<br>Central de Asturias-<br>HUCA, Oviedo, ES | Principal Investigator                            | Pedro        | Vega             | N Total = 45<br>*SR Classic = 45/45 (100%)<br>SR Combo = 0<br>Direct Asp = 0 |
|                                                                    | Sub-Investigator                                  | Eduardo      | Murias           |                                                                              |
|                                                                    | Sub-Investigator                                  | Juan         | Chaviano         |                                                                              |
|                                                                    | Sub-Investigator                                  | Jose Maria   | Jimenez          |                                                                              |
| University Hospital<br>Basel, Basel, CH                            | Principal Investigator, Steering Committee Member | Marios-Nikos | Psychogios       | N Total = 40<br>SR Classic = 0<br>*SR Combo = 35/40 (88%)<br>Direct Asp = 5  |
|                                                                    | Sub-Investigator                                  | Ioannis      | Tsogkas          |                                                                              |
|                                                                    | Sub-Investigator                                  | Peter        | Sporns           |                                                                              |
|                                                                    | Sub-Investigator                                  | Kristine     | Blackham         |                                                                              |
|                                                                    | Study Coordinator                                 | Alex         | Brehm            |                                                                              |
| University Hospital<br>Hradec Kralove, CZ                          | Principal Investigator, Steering Committee Member | Antonin      | Krajina          | N Total = 40<br>*SR Classic = 20/40 (50%)<br>SR Combo = 16<br>Direct Asp = 4 |
|                                                                    | Sub-Investigator                                  | Ondrej       | Renc             |                                                                              |
|                                                                    | Sub-Investigator                                  | Eva          | Vitkova          |                                                                              |
|                                                                    | Sub-Investigator                                  | Vendelin     | Chovanec         |                                                                              |
|                                                                    | Sub-Investigator                                  | Jan          | Raupach          |                                                                              |

|                                                                        |                                                   |            |           |                                                                              |
|------------------------------------------------------------------------|---------------------------------------------------|------------|-----------|------------------------------------------------------------------------------|
|                                                                        | Sub-Investigator                                  | Miroslav   | Lojik     |                                                                              |
| Choonam National University Hospital, KR                               | Principal Investigator, Steering Committee Member | Woong      | Yoon      | N Total = 36<br>*SR Classic = 10/36 (28%)<br>SR Combo = 18<br>Direct Asp = 8 |
|                                                                        | Sub-Investigator                                  | Byung Hyun | Baek      |                                                                              |
|                                                                        | Study Coordinator                                 | Eugene     | Kim       |                                                                              |
|                                                                        |                                                   |            |           |                                                                              |
| Bon Secours Mercy Health St. Vincent Medical Center, Toledo, Ohio, USA | Principal Investigator, Steering Committee Member | Osama      | Zaidat    | N Total = 33<br>SR Classic = 6<br>*SR Combo = 17/33 (52%)<br>Direct Asp = 10 |
|                                                                        | Sub-Investigator                                  | Saif       | Bushnaq   |                                                                              |
|                                                                        | Sub-Investigator                                  | Bader      | Alenzi    |                                                                              |
|                                                                        | Sub-Investigator                                  | Nicholas   | Liaw      |                                                                              |
|                                                                        | Sub-Investigator                                  | Eugene     | Lin       |                                                                              |
|                                                                        | Sub-Investigator                                  | Varun      | Chaubal   |                                                                              |
|                                                                        | CRC Manager                                       | Alyssa     | Bickley   |                                                                              |
|                                                                        | CRC Manager                                       | Ronda      | White     |                                                                              |
|                                                                        | Research Assistant                                | India      | Bass      |                                                                              |
|                                                                        | Study Coordinator                                 | Amy        | Krueger   |                                                                              |
|                                                                        | Study Coordinator                                 | Cynthia    | Upham     |                                                                              |
| West Virginia University Hospital, USA                                 | Principal Investigator, Steering Committee Member | Ansaar     | Rai       | N Total = 30<br>SR Classic = 2<br>*SR Combo = 26/30 (87%)<br>Direct Asp = 2  |
|                                                                        | Sub-Investigator                                  | Sohyun     | Boo       |                                                                              |
|                                                                        | Sub-Investigator                                  | Abdul      | Tarabishy |                                                                              |
|                                                                        | Sub-Investigator                                  | Gerard     | Deib      |                                                                              |
|                                                                        | Nurse Practitioner                                | Rachel     | Gregis    |                                                                              |
|                                                                        | Medical Student                                   | Abdul      | Alhalak   |                                                                              |
|                                                                        | Study Coordinator                                 | Jennifer   | Domico    |                                                                              |
| AOPU G. Martino, IT                                                    | Principal Investigator                            | Antonio    | Pitrone   | N Total = 30<br>SR Classic = 0<br>SR Combo = 13<br>*Direct Asp = 17/30 (57%) |
|                                                                        | Sub-Investigator                                  | Orazio     | Buonomo   |                                                                              |
|                                                                        | Sub-Investigator                                  | Agostino   | Tessitore |                                                                              |
|                                                                        | Sub-Investigator                                  | Nicola     | Milazzo   |                                                                              |

|                                                                     |                        |              |                   |                                                                              |
|---------------------------------------------------------------------|------------------------|--------------|-------------------|------------------------------------------------------------------------------|
|                                                                     | Sub-Investigator       | Mariano      | Velo              |                                                                              |
|                                                                     | Sub-Investigator       | Antonio      | Caragliano        |                                                                              |
|                                                                     | Sub-Investigator       | Andrea       | Calzoni           |                                                                              |
|                                                                     | Study Coordinator      | Sergio Lucio | Vinci             |                                                                              |
| The Catholic University of Korea, St. Vincent's Hospital, Suwon, KR | Principal Investigator | Dong Hoon    | Lee               | N Total = 28<br>*SR Classic = 10/28 (36%)<br>SR Combo = 15<br>Direct Asp = 3 |
|                                                                     | Sub-Investigator       | Seung Yoon   | Song              |                                                                              |
|                                                                     | Sub-Investigator       | Ho Jun       | Yi                |                                                                              |
|                                                                     | Sub-Investigator       | Jae Hoon     | Sung              |                                                                              |
|                                                                     | Study Coordinator      | Narae        | Kwon              |                                                                              |
| Ospedale San Martino, Genova, IT                                    | Principal Investigator | Lucio        | Castellan         | N Total = 25<br>SR Classic = 0<br>*SR Combo = 3/25 (12%)<br>Direct Asp = 22  |
|                                                                     | Sub-Investigator       | Laura        | Malfatto          |                                                                              |
|                                                                     | Sub-Investigator       | Nicola       | Mavilio           |                                                                              |
|                                                                     | Sub-Investigator       | Giancarlo    | Salsano           |                                                                              |
|                                                                     | Sub-Investigator       | Bruno        | Del Sette         |                                                                              |
| AO Modena, IT                                                       | Principal Investigator | Guido        | Bigliardi         | N Total = 23<br>*SR Classic = 1/23 (4%)<br>SR Combo = 21<br>Direct Asp = 1   |
|                                                                     | Sub-Investigator       | Maria Luisa  | Dell'Acqua        |                                                                              |
|                                                                     | Sub-Investigator       | Laura        | Vandelli          |                                                                              |
|                                                                     | Sub-Investigator       | Giuseppe     | Borzi             |                                                                              |
|                                                                     | Sub-Investigator       | Ludovico     | Ciulli            |                                                                              |
|                                                                     | Sub-Investigator       | Livio        | Picchetto         |                                                                              |
|                                                                     | Sub-Investigator       | Riccardo     | Ricceri           |                                                                              |
|                                                                     | Sub-Investigator       | Francesca    | Rosafio           |                                                                              |
|                                                                     | Sub-Investigator       | Stefano      | Vallone           |                                                                              |
| Study Coordinator                                                   | Stefania               | Maffei       |                   |                                                                              |
| Hospital Clínico San Carlos, ES                                     | Principal Investigator | Luis         | López Ibor        | N Total = 22<br>SR Classic = 2<br>*SR Combo = 18/22 (82%)<br>Direct Asp = 2  |
|                                                                     | Sub-Investigator       | Manuel       | Moreu             |                                                                              |
|                                                                     | Sub-Investigator       | Santiago     | Rosati            |                                                                              |
|                                                                     | Sub-Investigator       | Carlos       | Gomez-Escalonilla |                                                                              |
| Geisinger Medical Center, Danville, Pennsylvania, USA               | Principal Investigator | Clemens      | Schirmer          | N Total = 21<br>SR Classic = 0<br>*SR Combo = 4/21 (19%)                     |
|                                                                     | Sub-Investigator       | Itay         | Melamed           |                                                                              |
|                                                                     | Sub-Investigator       | Gregory      | Weiner            |                                                                              |

|                                    |                        |             |               |                                                                             |
|------------------------------------|------------------------|-------------|---------------|-----------------------------------------------------------------------------|
|                                    | Sub-Investigator       | Oded        | Goren         | Direct Asp = 17                                                             |
|                                    | Sub-Investigator       | Christoph   | Griessenauer  |                                                                             |
|                                    | Sub-Investigator       | Shamsher    | Dalal         |                                                                             |
|                                    | Nurse                  | Karissa     | Graham        |                                                                             |
|                                    | Study Coordinator      | Katherine   | Freedman      |                                                                             |
|                                    | Study Coordinator      | Angela      | Whitmire      |                                                                             |
|                                    | Study Coordinator      | Chelsie     | Derr          |                                                                             |
| Mount Sinai Health System, USA     | Principal Investigator | Shahram     | Majidi        | N Total = 18<br>SR Classic = 0<br>SR Combo = 5<br>*Direct Asp = 13/18 (72%) |
|                                    | Sub-Investigator       | Christopher | Kellner       |                                                                             |
|                                    | Sub-Investigator       | Paul        | Singh         |                                                                             |
|                                    | Sub-Investigator       | Johanna     | Fifi          |                                                                             |
|                                    | Sub-Investigator       | Hazem       | Shoirah       |                                                                             |
|                                    | Sub-Investigator       | Reade       | DeLeacy       |                                                                             |
|                                    | Sub-Investigator       | Tomoyoshi   | Shigematsu    |                                                                             |
|                                    | Sub-Investigator       | Pouria      | Moshayedi     |                                                                             |
|                                    | Sub-Investigator       | Krisztina   | Moldovan      |                                                                             |
|                                    | Sub-Investigator       | Gregory     | Lock          |                                                                             |
|                                    | Sub-Investigator       | Thomas      | Oxley         |                                                                             |
|                                    | Sub-Investigator       | Benjamin    | Rapoport      |                                                                             |
|                                    | Sub-Investigator       | Jacopo      | Scaggiante    |                                                                             |
|                                    | Sub-Investigator       | Mais        | Al Kawaz      |                                                                             |
|                                    | Study Coordinator      | Sukaina     | Davdani       |                                                                             |
|                                    | Study Coordinator      | Emily       | Fiano         |                                                                             |
| Study Coordinator                  | Armand                 | Harb        |               |                                                                             |
| Study Coordinator                  | Serina                 | Deeba       |               |                                                                             |
| AZ Sint Jan Brugge Oostende AV, BE | Principal Investigator | Geert       | Vanhooren     | N Total = 17<br>*SR Classic = 13/17 (76%)<br>SR Combo = 3<br>Direct Asp = 1 |
|                                    | Sub-Investigator       | Sofie       | De Blauwe     |                                                                             |
|                                    | Sub-Investigator       | Olivier     | Deryck        |                                                                             |
|                                    | Sub-Investigator       | Bruno       | Bergmans      |                                                                             |
|                                    | Sub-Investigator       | Tybault     | Hollanders    |                                                                             |
|                                    | Sub-Investigator       | Heleen      | Parmentier    |                                                                             |
|                                    | Sub-Investigator       | Ludo        | Vanopdenbosch |                                                                             |

|                                          |                                                   |                   |                |                                                                              |
|------------------------------------------|---------------------------------------------------|-------------------|----------------|------------------------------------------------------------------------------|
|                                          | Sub-Investigator                                  | Kristof           | Verhoeven      |                                                                              |
|                                          | Sub-Investigator                                  | Melissa           | Cambron        |                                                                              |
|                                          | Sub-Investigator                                  | Johan             | Ghekiere       |                                                                              |
|                                          | Sub-Investigator                                  | Annelies          | Van Dycke      |                                                                              |
|                                          | Sub-Investigator                                  | Isaline           | Demarcin       |                                                                              |
|                                          | Sub-Investigator                                  | Louise            | Adams          |                                                                              |
|                                          | Sub-Investigator                                  | Robin             | Bouttelgier    |                                                                              |
|                                          | Sub-Investigator                                  | Lisa              | Van Doeselaer  |                                                                              |
|                                          | Sub-Investigator                                  | Charlotte         | Vanden Berghe  |                                                                              |
|                                          | Sub-Investigator                                  | Arne              | Hostens        |                                                                              |
|                                          | Sub-Investigator                                  | Louise            | De Temmerman   |                                                                              |
|                                          | Study Coordinator                                 | Valérie           | Schotte        |                                                                              |
|                                          | Study Coordinator                                 | Heleen            | Couckuyt       |                                                                              |
|                                          | Study Coordinator                                 | Julie             | Derous         |                                                                              |
| Klinikum Rechts Der Isar, Munich, DE     | Principal Investigator                            | Charlotte         | Rüther         | N Total = 17<br>SR Classic = 0<br>*SR Combo = 17/17 (100%)<br>Direct Asp = 0 |
|                                          | Principal Investigator                            | Monika            | Probst         |                                                                              |
|                                          | Sub-Investigator                                  | Tobias            | Boeckh-Behrens |                                                                              |
|                                          | Sub-Investigator                                  | Kornelia          | Kreiser        |                                                                              |
|                                          | Sub-Investigator                                  | Christian         | Maegerlein     |                                                                              |
|                                          | Sub-Investigator                                  | Jan               | Kirschke       |                                                                              |
|                                          | Sub-Investigator                                  | Silke             | Wunderlich     |                                                                              |
| Study Coordinator                        | Maria                                             | Bauer             |                |                                                                              |
| Toronto Western, Toronto, Ontario, CA    | Principal Investigator, Steering Committee Member | Timo              | Krings         | N Total = 15<br>SR Classic = 1<br>SR Combo = 12<br>*Direct Asp = 2/15 (13%)  |
|                                          | Sub-Investigator                                  | Patrick           | Nicholson      |                                                                              |
|                                          | Sub-Investigator                                  | Ronit             | Agid           |                                                                              |
|                                          | Study Coordinator                                 | Alex              | Kostynskyy     |                                                                              |
| Doctors Medical Center, Modesto, CA, USA | Principal Investigator                            | James             | Jaffe          | N Total = 15<br>SR Classic = 0<br>SR Combo = 0<br>*Direct Asp = 15/15 (100%) |
|                                          | Sub-Investigator                                  | Chris             | Neal           |                                                                              |
|                                          | Study Coordinator                                 | Dharati (Dorothy) | Trivedi        |                                                                              |



|                                                                      |                        |                 |                 |                                                                              |
|----------------------------------------------------------------------|------------------------|-----------------|-----------------|------------------------------------------------------------------------------|
| Aurora St. Luke's<br>Medical Center,<br>Milwaukee, Wisconsin,<br>USA | Principal Investigator | Thomas          | Wolfe           | N Total = 15<br>SR Classic = 2<br>SR Combo = 6<br>*Direct Asp = 7/15 (47%)   |
|                                                                      | Sub-Investigator       | Kessarín        | Panichpisal     |                                                                              |
|                                                                      | Sub-Investigator       | Glen            | Pollock         |                                                                              |
|                                                                      | Sub-Investigator       | Sudeepta        | Dandapat        |                                                                              |
|                                                                      | Sub-Investigator       | Kavit           | Shah            |                                                                              |
|                                                                      | Nurse Practitioner     | Genevieve       | Kuchinsky       |                                                                              |
|                                                                      | Nurse Practitioner     | Samantha        | Goedde          |                                                                              |
|                                                                      | Nurse Practitioner     | Payton          | Tepp            |                                                                              |
|                                                                      | Study Coordinator      | Kristopher      | Rowe            |                                                                              |
|                                                                      | Study Coordinator      | Gary            | Dennison        |                                                                              |
|                                                                      | Study Coordinator      | Batul           | Dhariwala       |                                                                              |
|                                                                      | Study Coordinator      | Kaite           | McPolin         |                                                                              |
|                                                                      | Image Upload           | Tonya           | Hollrith        |                                                                              |
| Indiana University,<br>Bloomington, Indiana,<br>USA                  | Principal Investigator | Bradley         | Bohnstedt       | N Total = 15<br>SR Classic = 0<br>SR Combo = 2<br>*Direct Asp = 13/15 (87%)  |
|                                                                      | Study Coordinator      | Marissa         | Lowé            |                                                                              |
|                                                                      | Study Coordinator      | Lauren          | Snyder          |                                                                              |
| CHU Brest, FR                                                        | Principal Investigator | Jean-Christophe | Gentric         | N Total = 15<br>SR Classic = 0<br>*SR Combo = 15/15 (100%)<br>Direct Asp = 0 |
|                                                                      | Sub-Investigator       | Julien          | Ognard          |                                                                              |
|                                                                      | Sub-Investigator       | Lorena          | Nico            |                                                                              |
|                                                                      | Study Coordinator      | Géraldine       | Viard           |                                                                              |
| Hospital 12 de Octubre,<br>Madrid, ES                                | Principal Investigator | Eduardo         | Bárcena         | N Total = 15<br>SR Classic = 0<br>SR Combo = 6<br>*Direct Asp = 9/15 (60%)   |
|                                                                      | Sub-Investigator       | Fernando        | Ostos           |                                                                              |
|                                                                      | Sub-Investigator       | Federico        | Ballenilla      |                                                                              |
|                                                                      | Sub-Investigator       | Jorge           | Campollo        |                                                                              |
|                                                                      | Sub-Investigator       | Pedro           | Saura           |                                                                              |
|                                                                      | Sub-Investigator       | Miriam          | Fernandez Gomez |                                                                              |
| Montefiore Medical<br>Center, Bronx, New<br>York, USA                | Principal Investigator | David           | Altschul        | N Total = 13<br>SR Classic = 0<br>*SR Combo = 13/13 (100%)<br>Direct Asp = 0 |
|                                                                      | Sub-Investigator       | Neil            | Haranhali       |                                                                              |
|                                                                      | Sub-Investigator       | Seon-Kyu        | Lee             |                                                                              |
|                                                                      | Sub-Investigator       | Richard         | Zampolin        |                                                                              |
|                                                                      | Sub-Investigator       | Allan           | Brook           |                                                                              |

|                                                                              |                        |           |             |                                                                            |
|------------------------------------------------------------------------------|------------------------|-----------|-------------|----------------------------------------------------------------------------|
|                                                                              | Study Coordinator      | Aureliana | Toma        | N Total = 11<br>SR Classic = 4<br>*SR Combo = 5/11 (45%)<br>Direct Asp = 2 |
|                                                                              | Study Coordinator      | Lavinia   | Williams    |                                                                            |
| Kaiser Permanente<br>Southern California, Los<br>Angeles, California,<br>USA | Principal Investigator | Lei       | Feng        |                                                                            |
|                                                                              | Sub-Investigator       | Kuo       | Chao        |                                                                            |
|                                                                              | Study Coordinator      | Catherine | Lui         |                                                                            |
|                                                                              | Study Coordinator      | Ashima    | Sharma      |                                                                            |
|                                                                              | Study Coordinator      | Vanessa   | Audea       |                                                                            |
|                                                                              | Study Coordinator      | Nathalie  | Sanchez     |                                                                            |
| Study Coordinator                                                            | Marissa                | Barron    |             |                                                                            |
| Advocate Hospital,<br>Illinois, USA                                          | Principal Investigator | Demetrius | Lopes       |                                                                            |
|                                                                              | Sub-Investigator       | Joshua    | Billingsley |                                                                            |
|                                                                              | Sub-Investigator       | Khaled    | Asi         |                                                                            |
|                                                                              | Clinical Assessor      | Kiffon    | Keigher     |                                                                            |
|                                                                              | Clinical Assessor      | Bridget   | Cantrell    |                                                                            |
|                                                                              | Clinical Assessor      | Gina      | Barbaglia   |                                                                            |
|                                                                              | Clinical Assessor      | Eric      | Leadley     |                                                                            |
|                                                                              | Clinical Assessor      | Molly     | Baker       |                                                                            |
|                                                                              | Clinical Assessor      | Abigail   | Walters     |                                                                            |
|                                                                              | Neurologist            | Linda     | Jiang       |                                                                            |
|                                                                              | Neurologist            | Pavan     | Murty       |                                                                            |
|                                                                              | Neurologist            | Arth      | Srivastava  |                                                                            |
|                                                                              | Study Coordinator      | Nicholas  | Armijo      |                                                                            |
|                                                                              | Study Coordinator      | Gina      | Littlejohn  |                                                                            |
|                                                                              | Study Coordinator      | Sherri    | Velez       |                                                                            |
| Study Coordinator                                                            | Nicole                 | Hannigan  |             |                                                                            |
| Study Coordinator                                                            | Kathleen               | Hesse     |             |                                                                            |
| Dignity Health, Rancho<br>Cordova, California,<br>USA                        | Principal Investigator | Lucian    | Maidan      | N Total = 10<br>SR Classic = 0<br>*SR Combo = 5/10 (50%)<br>Direct Asp = 5 |
|                                                                              | Sub-Investigator       | Geroge    | Luh         |                                                                            |
|                                                                              | Study Coordinator      | Danielle  | Hornbuckle  |                                                                            |
|                                                                              | Study Coordinator      | Sharon    | Bluemel     |                                                                            |
| Hospital de la Princesa,<br>Madrid, ES                                       | Principal Investigator | Jose Luis | Caniego     | N Total = 9<br>*SR Classic = 9/9 (100%)                                    |
|                                                                              | Sub-Investigator       | Juan      | Vega        |                                                                            |

|                                                         |                                                    |                        |                 |                                                                          |
|---------------------------------------------------------|----------------------------------------------------|------------------------|-----------------|--------------------------------------------------------------------------|
|                                                         | Sub-Investigator                                   | Rafael                 | González        | SR Combo = 0<br>Direct Asp = 0                                           |
| Kaiser Fontana Medical Center, Fontana, California, USA | Principal Investigator                             | Conrad                 | Liang           | N Total = 9<br>SR Classic = 3<br>*SR Combo = 5/9 (56%)<br>Direct Asp = 1 |
|                                                         | Sub-Investigator                                   | Mazen                  | Noufal          |                                                                          |
|                                                         | Sub-Investigator                                   | Valerie                | Wyman           |                                                                          |
|                                                         | Study Coordinator                                  | Ashima                 | Sharma          |                                                                          |
|                                                         | Study Coordinator                                  | Vanessa                | Audea           |                                                                          |
| St. Mary's Medical Center, USA                          | Principal Investigator                             | Ali                    | Malek           | N Total = 9<br>SR Classic = 0<br>*SR Combo = 8/9 (89%)<br>Direct Asp = 1 |
|                                                         | Sub-Investigator                                   | Nils                   | Mueller-Kronast |                                                                          |
|                                                         | Sub-Investigator                                   | Dennys                 | Reyes           |                                                                          |
|                                                         | Neuro Hospitalist                                  | Juan                   | Ramos           |                                                                          |
|                                                         | Neuro Hospitalist                                  | Muneer                 | Hassan          |                                                                          |
|                                                         | Neuro Manager                                      | Jennafer               | Hallquist       |                                                                          |
|                                                         | APRN                                               | Natasha                | Molina          |                                                                          |
|                                                         | APRN                                               | Sandra                 | Ripper-Brown    |                                                                          |
|                                                         | APRN                                               | Charity                | Denson          |                                                                          |
|                                                         | Study Coordinator                                  | Marianne               | Torres-Malaga   |                                                                          |
| Westchester Medical Center, Valhalla, New York, USA     | Principal Investigator                             | Fawaz                  | Al-Mufti        | N Total = 9<br>SR Classic = 0<br>*SR Combo = 1/9 (11%)<br>Direct Asp = 8 |
|                                                         | Sub-Investigator                                   | Chirag                 | Ghandhi         |                                                                          |
|                                                         | Sub-Investigator                                   | Justin                 | Santarelli      |                                                                          |
|                                                         | Sub-Investigator                                   | Gurmeen                | Kaur            |                                                                          |
|                                                         | Sub-Investigator                                   | Christeena             | Kurian          |                                                                          |
|                                                         | Fellow                                             | Jared                  | Cooper          |                                                                          |
|                                                         | Fellow                                             | Haris                  | Kamal           |                                                                          |
|                                                         | Fellow                                             | Katarina               | Dakay           |                                                                          |
|                                                         | Physician Assistant                                | Divya                  | Viswanathan     |                                                                          |
|                                                         | Study Coordinator                                  | Monique                | Carrero-Tagle   |                                                                          |
|                                                         | Study Coordinator                                  | Kevin                  | Clare           |                                                                          |
|                                                         | Study Coordinator                                  | Bridget                | Nolan           |                                                                          |
|                                                         | Semmes Murphey Foundation, Memphis, Tennessee, USA | Principal Investigator | Lucas           |                                                                          |
| Sub-Investigator                                        |                                                    | Adam                   | Arthur          |                                                                          |
| Sub-Investigator                                        |                                                    | Daniel                 | Hoit            |                                                                          |

|                                                           |                             |             |             |                                                                         |
|-----------------------------------------------------------|-----------------------------|-------------|-------------|-------------------------------------------------------------------------|
|                                                           | Sub-Investigator            | Violiza     | Inoa        | Direct Asp = 4                                                          |
|                                                           | Sub-Investigator            | Christopher | Nickele     |                                                                         |
|                                                           | Sub-Investigator            | David       | Dornbos     |                                                                         |
|                                                           | Sub-Investigator            | Nitin       | Goyal       |                                                                         |
|                                                           | Sub-Investigator            | Jeremy      | Peterson    |                                                                         |
|                                                           | Sub-Investigator            | Radmehr     | Torabi      |                                                                         |
|                                                           | Sub-Investigator            | Daniel      | Heiferman   |                                                                         |
|                                                           | Sub-Investigator            | Kendrick    | Johnson     |                                                                         |
|                                                           | Nurse Practitioner          | Stephanie   | Wilson      |                                                                         |
|                                                           | Study Coordinator           | Amanda      | Nolte       |                                                                         |
|                                                           | Study Coordinator           | Stephanie   | Corder      |                                                                         |
|                                                           | Study Coordinator           | Valorie     | Horner      |                                                                         |
|                                                           | Study Coordinator           | Kamal       | Lotay       |                                                                         |
| Klinikum Dortmund,<br>Dortmund, DE                        | Principal Investigator      | Stefan      | Rohde       | N Total = 8<br>SR Classic = 0<br>SR Combo = 8<br>*Direct Asp = 0/8 (0%) |
|                                                           | Sub-Investigator            | Olaf        | Adamczewski |                                                                         |
|                                                           | Sub-Investigator            | Stephan     | Schwarz     |                                                                         |
|                                                           | Sub-Investigator            | Gernot      | Reimann     |                                                                         |
|                                                           | Sub-Investigator            | Rachid      | El Mouden   |                                                                         |
|                                                           | Sub-Investigator            | Ines        | Gaedke      |                                                                         |
|                                                           | Study Coordinator           | Kristina    | Hauptmann   |                                                                         |
|                                                           | Image Upload                | Torsten     | Döring      |                                                                         |
| Image Upload                                              | Bettina                     | Zoeller     |             |                                                                         |
| HUG Geneva, CH                                            | Principal Investigator      | Paolo       | Machi       | N Total = 8<br>SR Classic = 0<br>SR Combo = 8<br>*Direct Asp = 0/8 (0%) |
|                                                           | Sub-Investigator            | Gianmarco   | Bernava     |                                                                         |
|                                                           | Sub-Investigator            | Andrea      | Rosi        |                                                                         |
|                                                           | Sub-Investigator            | Jeremy      | Hofmeister  |                                                                         |
|                                                           | Study Coordinator           | Michel      | Muster      |                                                                         |
|                                                           | Clinical Research Assistant | Malvina     | Destro      |                                                                         |
| Memorial Healthcare<br>System, Hollywood,<br>Florida, USA | Principal Investigator      | Hoang       | Duong       | N Total = 7<br>SR Classic = 0<br>*SR Combo = 6/7 (86%)                  |
|                                                           | Principal Investigator      | Andrey      | Lima        |                                                                         |
|                                                           | Principal Investigator      | Brijesh     | Mehta       |                                                                         |

|                                                                    |                        |            |            |                                                                           |
|--------------------------------------------------------------------|------------------------|------------|------------|---------------------------------------------------------------------------|
|                                                                    | Research Director      | Doris      | Alaby      | Direct Asp = 1                                                            |
|                                                                    | RN                     | Joy        | Sessa      |                                                                           |
|                                                                    | Financial Manager      | Viviane    | Kleva      |                                                                           |
|                                                                    | Study Coordinator      | Erum       | Usman      |                                                                           |
|                                                                    | Study Coordinator      | Pamela     | Shaw       |                                                                           |
| Los Robles Regional Medical Center, Thousand Oaks, California, USA | Principal Investigator | Muhammad   | Taqi       | N Total = 7<br>SR Classic = 1<br>*SR Combo = 6/7 (86%)<br>Direct Asp = 0  |
|                                                                    | Study Coordinator      | Nicole     | Mercado    |                                                                           |
|                                                                    | Study Coordinator      | Anastasia  | Vechera    |                                                                           |
| Valley Baptist Harlingen, Harlingen, Texas, USA                    | Principal Investigator | Ameer      | Hassan     | N Total = 7<br>SR Classic = 0<br>*SR Combo = 7/7 (100%)<br>Direct Asp = 0 |
|                                                                    | Sub-Investigator       | Wondwossen | Tekle      |                                                                           |
|                                                                    | Study Coordinator      | Pualani    | Smith      |                                                                           |
| Azienda Ospedaliero-Universitaria di Parma, Parma, IT              | Principal Investigator | Roberto    | Menziozzi  | N Total = 6<br>*SR Classic = 0/6 (0%)<br>SR Combo = 5<br>Direct Asp = 1   |
|                                                                    | Sub-Investigator       | Enrico     | Epifani    |                                                                           |
|                                                                    | Sub-Investigator       | Andrea     | Andreone   |                                                                           |
|                                                                    | Sub-Investigator       | Matteo     | Fantoni    |                                                                           |
| Azienda Ospedaliera Universitaria le scotte, Siena, IT             | Principal Investigator | Ignazio    | Vallone    | N Total = 6<br>SR Classic = 0<br>*SR Combo = 0/6 (0%)<br>Direct Asp = 6   |
|                                                                    | Sub-Investigator       | Sandra     | Bracco     |                                                                           |
|                                                                    | Sub-Investigator       | Paola      | Gennari    |                                                                           |
| Hospital Vall d'Hebron, Barcelona, ES                              | Principal Investigator | Alejandro  | Tomasello  | N Total = 6<br>SR Classic = 0<br>*SR Combo = 3/6 (50%)<br>Direct Asp = 3  |
|                                                                    | Sub-Investigator       | David      | Hernandez  |                                                                           |
|                                                                    | Sub-Investigator       | Manuel     | Requena    |                                                                           |
|                                                                    | Sub-Investigator       | Carlos     | Piñana     |                                                                           |
|                                                                    | Sub-Investigator       | Marc Ribó  | Ribó       |                                                                           |
|                                                                    | Study Coordinator      | Eila       | Rivera     |                                                                           |
| Centre Hospitalier Universitaire Vaudois, Lusanne, Switzerland     | Principal Investigator | Guillaume  | Saliou     | N Total = 5<br>SR Classic = 0<br>SR Combo = 2<br>*Direct Asp = 3/5 (60%)  |
|                                                                    | Sub-Investigator       | Francesco  | Puccinelli |                                                                           |
|                                                                    | Sub-Investigator       | Bruno      | Bartolini  |                                                                           |
|                                                                    | Sub-Investigator       | Steven     | Hajdu      |                                                                           |
|                                                                    | Principal Investigator | Enrico     | Cotroneo   | N Total = 5<br>SR Classic = 0                                             |
|                                                                    | Sub-Investigator       | Andrea     | Vallone    |                                                                           |

|                                                                       |                           |              |                 |                                                                           |
|-----------------------------------------------------------------------|---------------------------|--------------|-----------------|---------------------------------------------------------------------------|
| Azienda Ospedaliera<br>San Camillo Forlanini,<br>Rome, IT             | Sub-Investigator          | Enrico       | Pampana         | SR Combo = 0<br>*Direct Asp = 5/5 (100%)                                  |
|                                                                       | Sub-Investigator          | Sebastiano   | Fabiano         |                                                                           |
|                                                                       | Sub-Investigator          | Luca         | Bertaccini      |                                                                           |
| Buffalo University,<br>Buffalo, New York,<br>USA                      | Principal Investigator    | Elad         | Levy            | N Total = 5<br>SR Classic = 0<br>*SR Combo = 4/5 (80%)<br>Direct Asp = 1  |
|                                                                       | Sub-Investigator          | Adnan        | Siddiqui        |                                                                           |
|                                                                       | Sub-Investigator          | Kenneth      | Snyder          |                                                                           |
|                                                                       | Sub-Investigator          | Jason        | Davies          |                                                                           |
|                                                                       | Regulatory Specialist     | Jennifer     | Gay             |                                                                           |
|                                                                       | Study Coordinator         | Mary         | Hartney         |                                                                           |
|                                                                       | Study Coordinator         | Staci        | Smith           |                                                                           |
| Thomas Jefferson<br>University,<br>Philadelphia,<br>Pennsylvania, USA | Principal Investigator    | Stavropoula  | Tjoumakaris     | N Total = 5<br>SR Classic = 0<br>SR Combo = 2<br>*Direct Asp = 3/5 (60%)  |
|                                                                       | Sub-Investigator          | Pascal       | Jabbour         |                                                                           |
|                                                                       | Sub-Investigator          | Michael Reid | Gooch           |                                                                           |
|                                                                       | Sub-Investigator          | Nabeel       | Herial          |                                                                           |
|                                                                       | Study Coordinator         | Viola        | Dallas          |                                                                           |
| William Beaumont<br>Hospital, Royal Oak,<br>Michigan, USA             | Study Coordinator         | Nadirah      | Jones           | N Total = 5<br>SR Classic = 0<br>SR Combo = 0<br>*Direct Asp = 5/5 (100%) |
|                                                                       | Principal Investigator    | Jeffery      | Wilseck         |                                                                           |
|                                                                       | Sub-Investigator          | Chris        | Kazmierczak     |                                                                           |
|                                                                       | Study Coordinator         | Karen        | Sherer          |                                                                           |
|                                                                       | Study Coordinator         | Grace        | San Agustin     |                                                                           |
| Allegheny General<br>Hospital, Pittsburgh,<br>Pennsylvania, USA       | Study Coordinator         | Pamela       | Sloan           | N Total = 4<br>SR Classic = 0<br>*SR Combo = 3/4 (75%)<br>Direct Asp = 1  |
|                                                                       | Principal Investigator    | Andrew       | Ku              |                                                                           |
|                                                                       | Sub-Investigator          | Jonathan     | Pace            |                                                                           |
|                                                                       | Regulatory<br>Coordinator | Laurie       | Dennis          |                                                                           |
|                                                                       | Regulatory<br>Coordinator | Pamela       | White           |                                                                           |
|                                                                       | Study Coordinator         | Mary         | Fetter          |                                                                           |
| Research Institute,<br>University of Kansas                           | Study Coordinator         | Emily        | Shank           | N Total = 4<br>SR Classic = 0                                             |
|                                                                       | Principal Investigator    | Michael      | Abraham         |                                                                           |
|                                                                       | Sub-Investigator          | John         | Ernest Madarang |                                                                           |

|                                                                                 |                           |           |                 |                                                                           |
|---------------------------------------------------------------------------------|---------------------------|-----------|-----------------|---------------------------------------------------------------------------|
| Medical Center, Kansas<br>City, Kansas, USA                                     | Sub-Investigator          | Alan      | Reeves          | SR Combo = 2<br>*Direct Asp = 2/4 (50%)                                   |
|                                                                                 | Study Coordinator         | Carissa   | Walter          |                                                                           |
|                                                                                 | Study Coordinator         | Angie     | Barton          |                                                                           |
|                                                                                 | Study Coordinator         | Gentry    | Fowler          |                                                                           |
|                                                                                 | Study Coordinator         | Peyton    | Ackerman        |                                                                           |
| Banner Desert Medical<br>Center, Mesa, Arizona,<br>USA                          | Principal Investigator    | Mohamed   | Teleb           | N Total = 4<br>SR Classic = 0<br>SR Combo = 0<br>*Direct Asp = 4/4 (100%) |
|                                                                                 | Sub-Investigator          | Joel      | Stary           |                                                                           |
|                                                                                 | Nurse Practitioner        | Anna      | VerHage         |                                                                           |
|                                                                                 | Nurse Practitioner        | Kirstyn   | Andrade Hayes   |                                                                           |
|                                                                                 | Nurse Practitioner        | Megan     | Smith           |                                                                           |
|                                                                                 | Nurse Practitioner        | Jennifer  | Jones Berry     |                                                                           |
|                                                                                 | Study Coordinator         | Stephanie | Blythe          |                                                                           |
|                                                                                 | Study Coordinator         | Robert    | Flynn           |                                                                           |
|                                                                                 | Regulatory<br>Coordinator | Jenny     | Maxon           |                                                                           |
| UC Irvine, Irvine,<br>California, USA                                           | Principal Investigator    | Shuichi   | Suzuki          | N Total = 4<br>SR Classic = 0<br>SR Combo = 3<br>*Direct Asp = 1/4 (25%)  |
|                                                                                 | Sub-Investigator          | Kiarash   | Golshani        |                                                                           |
|                                                                                 | Sub-Investigator          | Ichiro    | Yuki            |                                                                           |
|                                                                                 | Study Coordinator         | Jeein     | Kim             |                                                                           |
|                                                                                 | Study Coordinator         | Chris     | Nishi           |                                                                           |
| Hospital Universitario<br>Marqués de Valdecilla,<br>Santander, ES               | Principal Investigator    | Andrés    | González-Mandly | N Total = 4<br>*SR Classic = 4/4 (100%)<br>SR Combo = 0<br>Direct Asp = 0 |
|                                                                                 | Sub-Investigator          | Alberto   | Gil Garcia      |                                                                           |
|                                                                                 | Sub-Investigator          | Enrique   | Palacio         |                                                                           |
| CHU Pellegrin<br>Service de Radiologie et<br>de Neuro-Imagerie,<br>Bordeaux, FR | Principal Investigator    | Xavier    | Barreau         | N Total = 3<br>SR Classic = 0<br>SR Combo = 1<br>*Direct Asp = 2/3 (67%)  |
|                                                                                 | Sub-Investigator          | Jérome    | Berge           |                                                                           |
|                                                                                 | Sub-Investigator          | Gaultier  | Marnat          |                                                                           |
|                                                                                 | Sub-Investigator          | Patrice   | Menegon         |                                                                           |
|                                                                                 | Sub-Investigator          | Florent   | Gariel          |                                                                           |
|                                                                                 | Sub-Investigator          | Nicolas   | Pangon          |                                                                           |

|                                                             |                        |          |             |                                                                           |
|-------------------------------------------------------------|------------------------|----------|-------------|---------------------------------------------------------------------------|
| Sparrow Clinical Research Institute, Lansing, Michigan, USA | Study Coordinator      | Tristan  | Kerdraon    | N Total = 3<br>SR Classic = 0<br>SR Combo = 1<br>*Direct Asp = 2/3 (67%)  |
|                                                             | Principal Investigator | Anmar    | Razak       |                                                                           |
|                                                             | Sub-Investigator       | Yogesh   | Gujrati     |                                                                           |
|                                                             | Sub-Investigator       | Muhammad | Saleemi     |                                                                           |
|                                                             | Study Coordinator      | Janelle  | Dreffs      |                                                                           |
|                                                             | Study Coordinator      | Sandra   | Mitchell    |                                                                           |
|                                                             | Study Coordinator      | Jennifer | Boak        |                                                                           |
|                                                             | Study Coordinator      | Lonna    | Blaske      |                                                                           |
| Legacy Emanuel Medical Center, Portland, Oregon, USA        | Regulatory Coordinator | Jacki    | Wilson      | N Total = 3<br>SR Classic = 0<br>*SR Combo = 3/3 (100%)<br>Direct Asp = 0 |
|                                                             | Principal Investigator | David    | Siker       |                                                                           |
|                                                             | Study Coordinator      | Karla    | Kummer      |                                                                           |
| Baptist Jacksonville, Jacksonville, Florida, USA            | Regulatory Coordinator | Laura    | Allen       | N Total = 3<br>SR Classic = 0<br>*SR Combo = 3/3 (100%)<br>Direct Asp = 0 |
|                                                             | Principal Investigator | Amin     | Aghaebrahim |                                                                           |
|                                                             | Sub-Investigator       | Ricardo  | Hanel       |                                                                           |
|                                                             | Sub-Investigator       | Eric     | Sauvageau   |                                                                           |
|                                                             | Study Coordinator      | Vickie   | Melton      |                                                                           |
|                                                             | Study Coordinator      | Nancy    | Ebreo       |                                                                           |
|                                                             | Study Coordinator      | LaNaya   | Lewis       |                                                                           |
|                                                             | Study Coordinator      | Miranda  | Smudzinski  |                                                                           |
| University of S. Florida/Tampa General, Florida, USA        | Study Coordinator      | Gina     | Munden      | N Total = 3<br>SR Classic = 0<br>SR Combo = 0<br>*Direct Asp = 3/3 (100%) |
|                                                             | Regulatory Coordinator | Carrie   | Thornton    |                                                                           |
|                                                             | Principal Investigator | Maxim    | Mokin       |                                                                           |
|                                                             | Sub-Investigator       | Waldo    | Guerrero    |                                                                           |
|                                                             | Sub-Investigator       | Shail    | Thanki      |                                                                           |
|                                                             | Sub-Investigator       | Kunal    | Vakharia    |                                                                           |
|                                                             | Study Coordinator      | Amy      | DeNardo     |                                                                           |
| Study Coordinator                                           | Jordan                 | Nickels  |             |                                                                           |
|                                                             | Regulatory Coordinator | Rachel   | Karlnoski   |                                                                           |



|                                                                    |                        |             |                |                                                                           |
|--------------------------------------------------------------------|------------------------|-------------|----------------|---------------------------------------------------------------------------|
| Stanford, Stanford,<br>California, USA                             | Principal Investigator | Robert      | Dodd           | N Total = 3<br>SR Classic = 0<br>*SR Combo = 0/3 (0%)<br>Direct Asp = 3   |
|                                                                    | Sub-Investigator       | Nick        | Telischak      |                                                                           |
|                                                                    | Sub-Investigator       | Huy         | Do             |                                                                           |
|                                                                    | Study Coordinator      | Anthony     | Bet            |                                                                           |
|                                                                    | Sub-Investigator       | Jérôme      | Berge          |                                                                           |
|                                                                    | Sub-Investigator       | Gaultier    | Marnat         |                                                                           |
|                                                                    | Sub-Investigator       | Patrice     | Menegon        |                                                                           |
|                                                                    | Sub-Investigator       | Florent     | Gariel         |                                                                           |
|                                                                    | Sub-Investigator       | Nicolas     | Pangon         |                                                                           |
| Study Coordinator                                                  | Tristan                | Kerdraon    |                |                                                                           |
| Klinikum Kassel,<br>Institut für<br>Neuroradiologie,<br>Kassel, DE | Principal Investigator | Ralf        | Siekmann       | N Total = 2<br>SR Classic = 0<br>*SR Combo = 1/2 (50%)<br>Direct Asp = 1  |
|                                                                    | Sub-Investigator       | Kai         | Koller         |                                                                           |
|                                                                    | Sub-Investigator       | Monika      | Huegens-Penzel |                                                                           |
|                                                                    | Study Coordinator      | Tanja       | Reuter         |                                                                           |
|                                                                    | Study Coordinator      | Frank       | Lückert        |                                                                           |
| Klinikum LMU<br>München, Munich, DE                                | Principal Investigator | Thomas      | Liebig         | N Total = 2<br>SR Classic = 0<br>SR Combo = 0<br>*Direct Asp = 2/2 (100%) |
|                                                                    | Sub-Investigator       | Robert      | Forbrig        |                                                                           |
|                                                                    | Sub-Investigator       | Yigit       | Özpeynirci     |                                                                           |
|                                                                    | Sub-Investigator       | Christoph   | Trumm          |                                                                           |
|                                                                    | Sub-Investigator       | Christian   | Brem           |                                                                           |
| University Medical<br>Center, El Paso, Texas,<br>USA               | Study Coordinator      | Andrea      | Jäger          | N Total = 2<br>SR Classic = 0<br>*SR Combo = 2/2 (100%)<br>Direct Asp = 0 |
|                                                                    | Principal Investigator | Alberto     | Maud           |                                                                           |
|                                                                    | Principal Investigator | Gustavo     | Rodriguez      |                                                                           |
|                                                                    | Sub-Investigator       | Faheem      | Sherriff       |                                                                           |
|                                                                    | Sub-Investigator       | Ofelia      | Portillo       |                                                                           |
| Riverside Methodist –<br>OHRI, Columbus, Ohio,<br>USA              | Study Coordinator      | Israel      | Alba           | N Total = 2<br>*SR Classic = 1/2 (50%)<br>SR Combo = 1<br>Direct Asp = 0  |
|                                                                    | Principal Investigator | Ronald      | Budzik         |                                                                           |
|                                                                    | Sub-Investigator       | Nirav       | Vora           |                                                                           |
|                                                                    | Sub-Investigator       | Peter       | Pema           |                                                                           |
|                                                                    | Sub-Investigator       | Abdulnasser | Alhajeri       |                                                                           |
|                                                                    | Study Coordinator      | Megan       | Heckathorne    |                                                                           |
| Study Coordinator                                                  | Katy                   | Groezinger  |                |                                                                           |

|                                                                          |                        |            |              |                                                                           |
|--------------------------------------------------------------------------|------------------------|------------|--------------|---------------------------------------------------------------------------|
|                                                                          | Study Coordinator      | Heather    | Bartelt      |                                                                           |
|                                                                          | Regulatory Coordinator | Diane      | Goodman      |                                                                           |
|                                                                          | Regulatory Coordinator | Laura      | Geran        |                                                                           |
| University of Massachusetts, Worcester, Massachusetts, USA               | Principal Investigator | Jasmeet    | Singh        | N Total = 2<br>SR Classic = 0<br>*SR Combo = 0/2 (0%)<br>Direct Asp = 2   |
|                                                                          | Sub-Investigator       | Francesco  | Massari      |                                                                           |
|                                                                          | Study Coordinator      | Noelle     | Bodkin       |                                                                           |
|                                                                          | Study Coordinator      | Baaba      | Baiden       |                                                                           |
| University of Oklahoma Medical Center, Oklahoma, USA                     | Principal Investigator | Ahmed      | Cheema       | N Total = 1<br>SR = 0<br>SR Classic Combo = 0<br>*Direct Asp = 1/1 (100%) |
|                                                                          | Principal Investigator | Andrew     | Bauer        |                                                                           |
|                                                                          | Sub-Investigator       | Hakeem     | Shakir       |                                                                           |
|                                                                          | Study Coordinator      | April      | Vaughan      |                                                                           |
|                                                                          | Study Coordinator      | Zainab     | Al Obaidi    |                                                                           |
| Imperial College Healthcare NHS Trust Charing Cross Hospital, London, UK | Principal Investigator | Kyriakos   | Lobotesis    | N Total = 1<br>SR Classic = 0<br>SR Combo = 0<br>*Direct Asp = 1/1 (100%) |
|                                                                          | Sub-Investigator       | Abhinav    | Singh        |                                                                           |
|                                                                          | Sub-Investigator       | Neil       | Rane         |                                                                           |
|                                                                          | Sub-Investigator       | Dylan      | Roi          |                                                                           |
|                                                                          | Sub-Investigator       | Gavin      | Fatania      |                                                                           |
|                                                                          | Study Coordinator      | Sarah      | Cardona      |                                                                           |
|                                                                          | Study Coordinator      | Tina       | Stoycheva    |                                                                           |
| CHU Rouen "Charles Nicolle", Rouen, FR                                   | Regulatory Coordinator | Lesley     | Honeyfield   | N Total = 1<br>SR Classic = 0<br>*SR Combo = 1/1 (100%)<br>Direct Asp = 0 |
|                                                                          | Principal Investigator | Chrysanthi | Papagiannaki |                                                                           |
|                                                                          | Sub-Investigator       | Margaux    | Lefebvre     |                                                                           |
|                                                                          | Study Coordinator      | Sebastien  | Normant      |                                                                           |

**Table S2: Sensitivity Analyses**

|                                                                                                                             | <b>SR Classic</b> | <b>SR Combination</b> | <b>Direct Aspiration</b> | <b>p-value</b> |
|-----------------------------------------------------------------------------------------------------------------------------|-------------------|-----------------------|--------------------------|----------------|
| <b>Primary Clinical Endpoint</b>                                                                                            |                   |                       |                          |                |
| <b>90-day mRS 0-2 vs 3-6</b>                                                                                                |                   |                       |                          |                |
| 90-day value, with missing data set to 3-6                                                                                  | 140 (56.7)        | 351 (50.4)            | 273 (49.8)               | 0.40           |
| Last observation carried forward (LOCF)                                                                                     | 145 (58.7)        | 361 (52.3)            | 298 (54.6)               | 0.41           |
| <b>Primary Procedural Endpoint eTICI 2c or 3 vs &lt;2c on the first pass for treatment of target occlusion</b>              |                   |                       |                          |                |
| eTICI with missing data set to <2c [1]                                                                                      | 110 (44.5)        | 309 (44.3)            | 193(35.2)                | 0.01           |
| [1] If eTICI at end of first pass for treatment of target occlusion is missing, eTICI is set to <2c to represent a failure. |                   |                       |                          |                |

**Table S3: Serious Adverse Events**

| <b>MedDRA<br/>System Organ<br/>Class/Preferred<br/>Term</b> | <b>SR Classic</b> |                   | <b>SR Combination</b> |                   | <b>Direct Aspiration</b> |                   |
|-------------------------------------------------------------|-------------------|-------------------|-----------------------|-------------------|--------------------------|-------------------|
|                                                             | <b>Procedure</b>  | <b>Device [1]</b> | <b>Procedure</b>      | <b>Device [1]</b> | <b>Procedure</b>         | <b>Device [1]</b> |
| Any Serious Adverse Event(SAE)                              | 16 (6·5%)         | 8 (3·2%)          | 40 (5·7%)             | 6 (0·9%)          | 23 (4·2%)                | 5 (0·9%)          |
| Blood and lymphatic system disorders                        | 0                 | 0                 | 3 (0·4%)              | 0                 | 1 (0·2%)                 | 0                 |
| Gastrointestinal disorders                                  | 1 (0·4%)          | 0                 | 2 (0·3%)              | 0                 | 0                        | 0                 |
| General disorders and administration site conditions        | 0                 | 0                 | 1 (0·1%)              | 0                 | 0                        | 0                 |
| Injury, poisoning and procedural complications              | 1 (0·4%)          | 0                 | 10 (1·4%)             | 0                 | 1 (0·2%)                 | 0                 |
| Nervous system disorders                                    | 12 (4·9%)         | 8 (3·2%)          | 19 (2·7%)             | 5 (0·7%)          | 13 (2·4%)                | 5 (0·9%)          |
| Product issues                                              | 0                 | 0                 | 1 (0·1%)              | 0                 | 0                        | 0                 |
| Renal and urinary disorders                                 | 0                 | 0                 | 0                     | 0                 | 3 (0·5%)                 | 0                 |
| Respiratory, thoracic and mediastinal disorders             | 0                 | 0                 | 1 (0·1%)              | 0                 | 1 (0·2%)                 | 0                 |
| Surgical and medical procedures                             | 0                 | 0                 | 1 (0·1%)              | 0                 | 0                        | 0                 |
| Vascular disorders                                          | 3 (1·2%)          | 0                 | 3 (0·4%)              | 1 (0·1%)          | 5 (0·9%)                 | 1 (0·2%)          |

Values reported as n (%) are on a subject level. If a subject has multiple events, they are only counted once within a category.

[1] Only SAEs related to Stryker devices are reported.

**Table S4: Non-serious Adverse Events**

| MedDRA<br>System Organ<br>Class/Preferred<br>Term    | SR Classic |            | SR Combination |            | Direct Aspiration |            |
|------------------------------------------------------|------------|------------|----------------|------------|-------------------|------------|
|                                                      | Procedure  | Device [1] | Procedure      | Device [1] | Procedure         | Device [1] |
| Any Non-Serious Adverse Event (AE)                   | 24 (9.7%)  | 3 (1.2%)   | 44 (6.3%)      | 11 (1.6%)  | 25 (4.6%)         | 5 (0.9%)   |
| Cardiac disorders                                    | 1 (0.4%)   | 0          | 1 (0.1%)       | 0          | 0                 | 0          |
| Ear and labyrinth disorders                          | 0          | 0          | 0              | 0          | 1 (0.2%)          | 0          |
| Gastrointestinal disorders                           | 0          | 0          | 1 (0.1%)       | 0          | 0                 | 0          |
| General disorders and administration site conditions | 0          | 0          | 1 (0.1%)       | 0          | 3 (0.5%)          | 0          |
| Infections and infestations                          | 0          | 0          | 1 (0.1%)       | 0          | 0                 | 0          |
| Injury, poisoning and procedural complications       | 2 (0.8%)   | 1 (0.4%)   | 7 (1.0%)       | 0          | 5 (0.9%)          | 0          |
| Nervous system disorders                             | 17 (6.9%)  | 2 (0.8%)   | 26 (3.7%)      | 9 (1.3%)   | 15 (2.7%)         | 5 (0.9%)   |
| Psychiatric disorders                                | 0          | 0          | 1 (0.1%)       | 0          | 0                 | 0          |
| Renal and urinary disorders                          | 0          | 0          | 4 (0.6%)       | 0          | 0                 | 0          |
| Respiratory, thoracic and mediastinal disorders      | 0          | 0          | 1 (0.1%)       | 0          | 1 (0.2%)          | 0          |
| Vascular disorders                                   | 5 (2.0%)   | 0          | 6 (0.9%)       | 2 (0.3%)   | 1 (0.2%)          | 0          |

Note: Values reported as n (%) are on a subject level. If a subject has multiple events, they are only counted once within a category.

[1] Only AEs related to Stryker devices are reported.

**Table S5 Device malfunctions (Stryker only)**

| <b>Device Malfunction/Nonconformity</b>                                                                | <b># Events</b> | <b># Subjects (n (%))</b> |
|--------------------------------------------------------------------------------------------------------|-----------------|---------------------------|
| Any malfunction/nonconformity                                                                          | 41              | 30 (2·01%)                |
| Damage to device noted (kink, bend, fracture) inside of package/removing from package; device not used | 1               | 1 (3·33%)                 |
| Device Sterility Compromised; Device not used                                                          | 0               | 0 (0·00%)                 |
| Failure to Deliver Device at Intended Location                                                         | 10              | 10 (33·33%)               |
| Retriever shaped section will not fully open inside vessel                                             | 0               | 0 (0·00%)                 |
| Positioning issues (Difficulty re-sheathing the retriever)                                             | 2               | 2 (6·67%)                 |
| Retriever clot integration issue/retracting issue                                                      | 3               | 3 (10·00%)                |
| Resistance during advancement                                                                          | 4               | 4 (13·33%)                |
| Poor visualization of device                                                                           | 0               | 0 (0·00%)                 |
| Device separation or fracture during procedure use                                                     | 0               | 0 (0·00%)                 |
| Device deformation or collapse during procedure use                                                    | 2               | 2 (6·67%)                 |
| Device difficult or could not be removed from vasculature                                              | 2               | 2 (6·67%)                 |
| Device kink/bend noticed during procedure use                                                          | 3               | 3 (10·00%)                |
| Balloon burst or unable to deflate                                                                     | 5               | 5 (16·67%)                |
| Other                                                                                                  | 9               | 9 (30·00%)                |

**Table S6: Race/ethnicity**

|                                                                                     | <b>SR Classic</b> | <b>SR<br/>Combination</b> | <b>Direct<br/>Aspiration</b> |
|-------------------------------------------------------------------------------------|-------------------|---------------------------|------------------------------|
| Race, n (%) [1]                                                                     |                   |                           |                              |
| Asian                                                                               | 22(20·2)          | 40(6·7)                   | 14(3·9)                      |
| Black/African American                                                              | 2(1·8)            | 45(7·6)                   | 55(15·2)                     |
| Native Hawaiian/Pacific<br>Islander                                                 | 0                 | 1(0·2)                    | 1(0·3)                       |
| White                                                                               | 84(77·1)          | 497(83·4)                 | 278(76·6)                    |
| Other                                                                               | 1(0·9)            | 13(2·2)                   | 15(4·1)                      |
| Hispanic/Latino, n (%) [2]                                                          | 5(4·7)            | 60(10·1)                  | 53(14·8)                     |
| [1] 424 patients are missing data on race due to local regulatory requirements      |                   |                           |                              |
| [2] 431 patients are missing data on ethnicity due to local regulatory requirements |                   |                           |                              |

**Table S7: Baseline Medications**

|                                       | SR Classic  | SR Combination | Direct Aspiration |
|---------------------------------------|-------------|----------------|-------------------|
| Taking anti-platelets/anti-coagulants | 104 (42.1%) | 351 (50.4%)    | 251 (45.9%)       |
| Aspirin                               | 45 (43.3%)  | 210 (59.8%)    | 145 (57.8%)       |
| Dipyridamole (Persantine®)            | 0           | 0              | 0                 |
| Aspirin & Dipyridamole (Aggrenox®)    | 0           | 3 (0.9%)       | 0                 |
| Clopidogrel (Plavix®)                 | 12 (11.5%)  | 45 (12.8%)     | 33 (13.1%)        |
| Cilostazol (Pletal®)                  | 0           | 0              | 0                 |
| Ticlopidine (Ticlid®)                 | 0           | 3 (0.9%)       | 0                 |
| Warfarin (Coumadin®)                  | 16 (15.4%)  | 38 (10.8%)     | 20 (8.0%)         |
| Direct thrombin Inhibitor             | 5 (4.8%)    | 6 (1.7%)       | 5 (2.0%)          |
| Factor Xa inhibitor                   | 21 (20.2%)  | 82 (23.4%)     | 65 (25.9%)        |
| Low molecular weight heparin          | 9 (8.7%)    | 17 (4.8%)      | 10 (4.0%)         |
| Unfractionated Heparin IV             | 2 (1.9%)    | 6 (1.7%)       | 4 (1.6%)          |
| Other anti-platelet/anti-coagulant    | 15 (14.4%)  | 11 (3.1%)      | 16 (6.4%)         |
| Taking IIb/IIIa inhibitors            | 1 (0.4%)    | 1 (0.1%)       | 1 (0.2%)          |
| Abciximab (ReoPro®)                   | 0           | 0              | 0                 |
| Tirofiban (Aggrastat®)                | 0           | 1 (100.0%)     | 1 (100.0%)        |
| Eptifibatide (Integrilin®)            | 0           | 0              | 0                 |
| Other IIb/IIIa Inhibitor              | 1 (100.0%)  | 0              | 0                 |
| Taking other meds                     | 170 (68.8%) | 483 (69.4%)    | 380 (69.5%)       |
| Statin(s)                             | 100 (58.8%) | 274 (56.7%)    | 213 (56.1%)       |
| Diabetic Medication(s)                | 38 (22.4%)  | 106 (21.9%)    | 98 (25.8%)        |
| Anti-hypertensive Medication(s)       | 142 (83.5%) | 405 (83.9%)    | 315 (82.9%)       |
| Anti-convulsant Medication(s)         | 5 (2.9%)    | 32 (6.6%)      | 23 (6.1%)         |



**Table S8: Hemorrhage Type (Core Lab Data):**

|                 | SR Classic | SR Combination | Direct Aspiration |
|-----------------|------------|----------------|-------------------|
| Any hemorrhage  |            |                |                   |
| Yes             | 85(35.3%)  | 262(38.9%)     | 234(43.5%)        |
| No              | 156(64.7%) | 412(61.1%)     | 304(56.5%)        |
| Hemorrhage Type |            |                |                   |
| HI-1            | 33(38.8%)  | 116(44.3%)     | 109(46.6%)        |
| HI-2            | 22(25.9%)  | 81(30.9%)      | 82(35.0%)         |
| PH-1            | 0          | 2(0.8%)        | 0                 |
| PH-2            | 3(3.5%)    | 11(4.2%)       | 9(3.8%)           |
| RIH             | 1(1.2%)    | 0              | 0                 |
| IVH             | 0          | 0              | 0                 |
| Subdural        | 0          | 0              | 0                 |
| Epidural        | 0          | 0              | 0                 |
| SAH             | 34(40.0%)  | 81(30.9%)      | 53(22.6%)         |

Subjects can have more than one hemorrhage type.

**Figure S1: Flowchart**

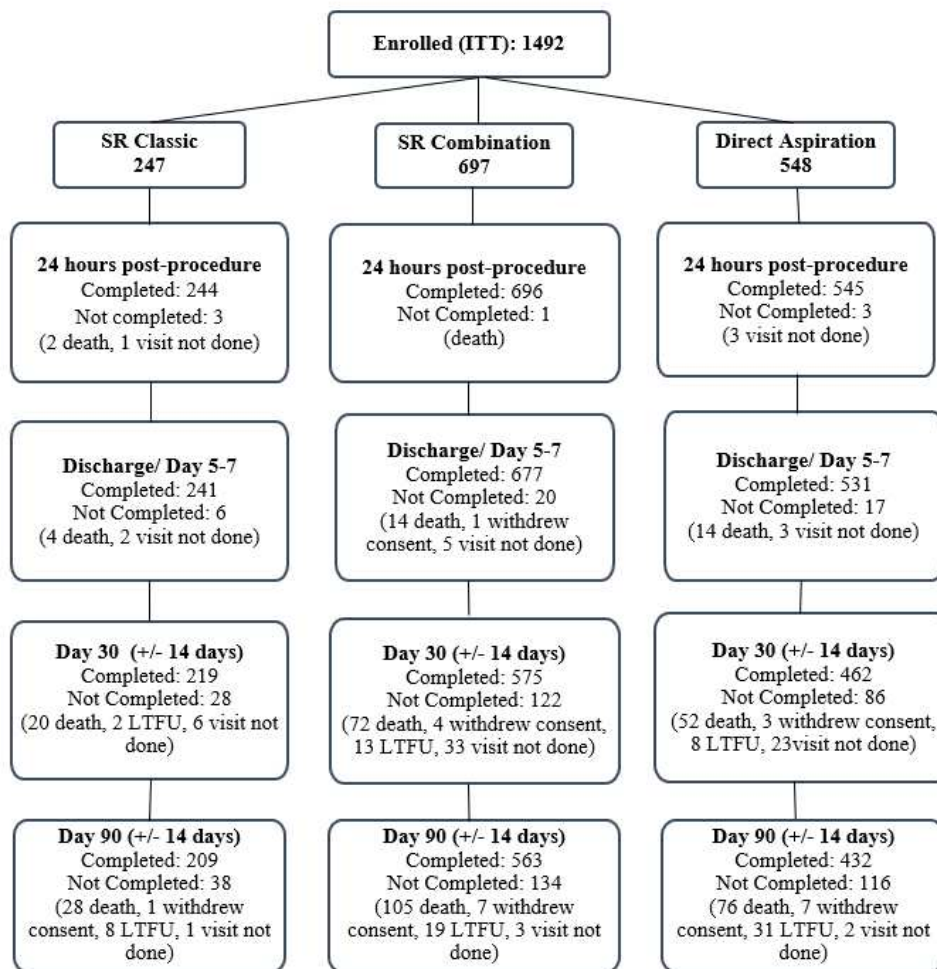

Supplement: inline-supplementary-material-1 [file inline-supplementary-material-1.pdf]
